# Supplementary material for: Temperature-Responsive Hydrogel for Silver Sulfadiazine Drug Delivery: Optimized Design and In Vitro/In Vivo Evaluation
Source: MDPI journal article supplement (doi:10.3390/gels9040329), 2023-04-13
Supplement: s1 [file s1]

## Supplementary data

### Verification of Regression Model on Diagnostic Plot

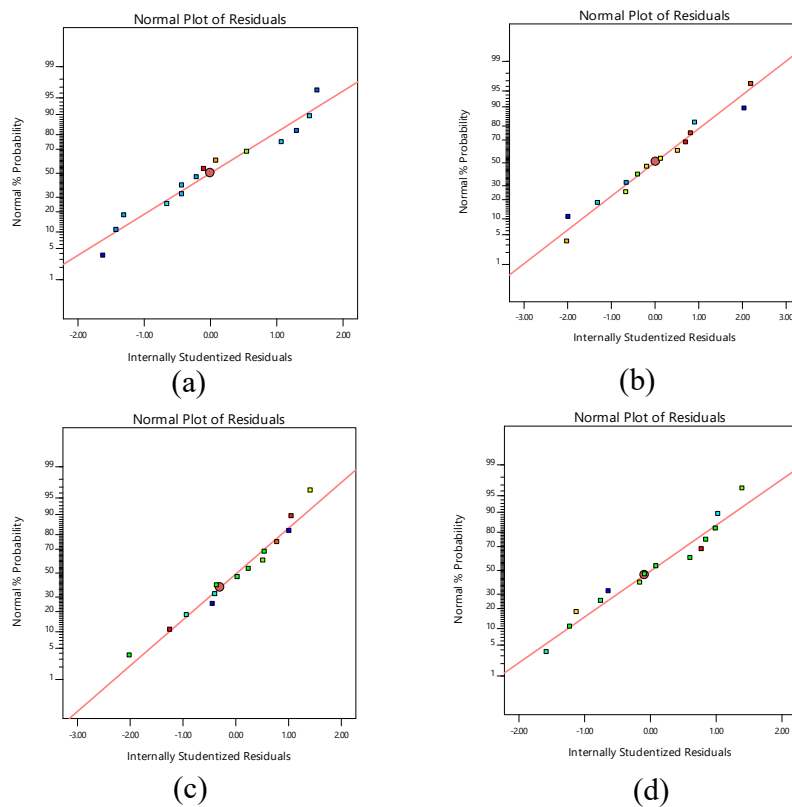

**Figure S1.** Plot of normal % probability versus internally studentised residual for (a) LCST (b) storage modulus ( $G'$ ) (c)  $t_{50\%}$ , and (d) inhibition zone diameter.

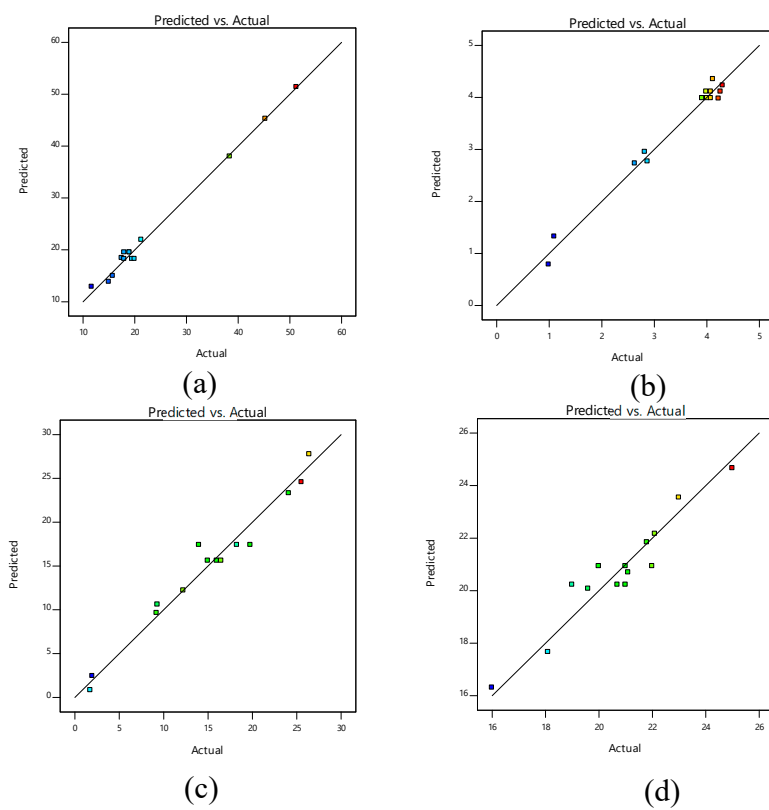

**Figure S2.** Plot of predicted versus actual values for (a) LCST (b) storage modulus (c)  $t_{50\%}$ , and (d) inhibition zone diameter.

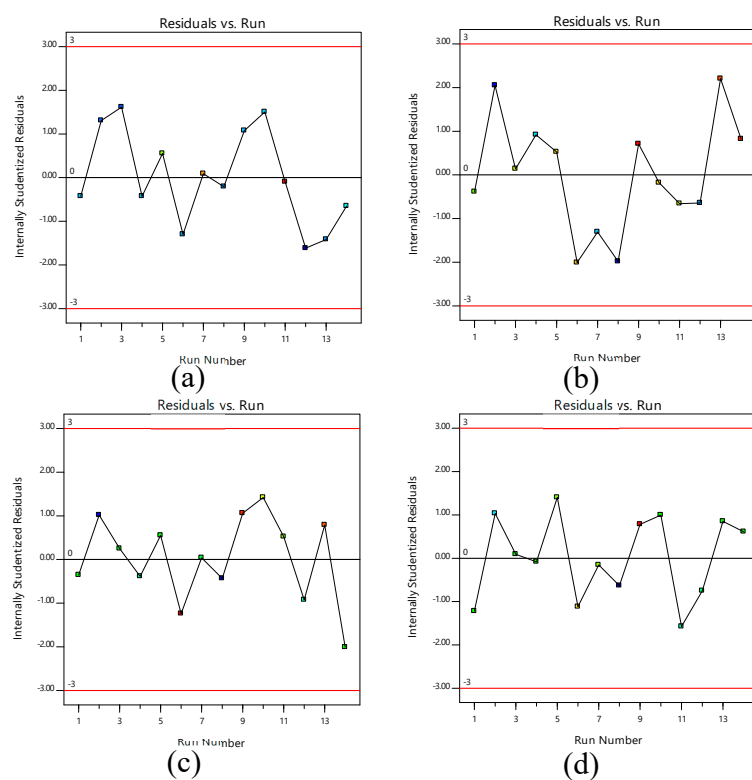

**Figure S3.** Plot of internally studentised residuals versus run number for (a) LCST (b) storage modulus ( $G'$ ) (c)  $t_{50\%}$ , and (d) inhibition zone diameter.

# ANIMALS AINFORMATION AND SKIN REACTION SCORES DURING IN-VIVO DERMAL TEST

## Information of animals during dermal sensitization test

Table S1 Information of test group animals during dermal sensitization test

| Test animal sequence | Animal number | Sex  | Initial body weight (g) | Body weight after challenge (g) |
|----------------------|---------------|------|-------------------------|---------------------------------|
| 009-01               | g176L         | Male | 378.18                  | 533.35                          |
| 009-02               | g177L         | Male | 366.51                  | 555.31                          |
| 009-03               | g178L         | Male | 361.79                  | 493.97                          |
| 009-04               | g179L         | Male | 382.69                  | 553.77                          |
| 009-05               | g180L         | Male | 446.66                  | 544.58                          |
| 009-06               | g181L         | Male | 389.29                  | 507.69                          |
| 009-07               | g182L         | Male | 377.53                  | 526.23                          |
| 009-08               | g183L         | Male | 383.50                  | 557.03                          |
| 009-09               | g184L         | Male | 393.41                  | 502.68                          |
| 009-10               | g185L         | Male | 398.72                  | 582.83                          |

Table S2 Information of positive control group animals during dermal sensitization test

| Test animal sequence | Animal number | Sex    | Initial body weight (g) | Body weight after challenge (g) |
|----------------------|---------------|--------|-------------------------|---------------------------------|
| PC-01                | g011L         | Male   | 461.90                  | 660.08                          |
| PC-02                | g012L         | Male   | 470.16                  | 619.73                          |
| PC-03                | g013L         | Male   | 433.08                  | 421.10                          |
| PC-04                | g014L         | Male   | 3911.87                 | 579.65                          |
| PC-05                | g015L         | Female | 419.18                  | 542.93                          |
| PC-06                | g016L         | Female | 426.82                  | 523.76                          |
| PC-07                | g017L         | Female | 399.55                  | 494.54                          |

|       |       |        |        |        |
|-------|-------|--------|--------|--------|
| PC-08 | g018L | Female | 420.70 | 562.18 |
| PC-09 | g019L | Female | 397.97 | 554.73 |
| PC-10 | g020L | Female | 374.98 | 476.68 |

Table S3 Information of negative control group animals during dermal sensitization test

| Test animal sequence | Animal number | Sex    | Initial body weight (g) | Body weight after challenge (g) |
|----------------------|---------------|--------|-------------------------|---------------------------------|
| NC-01                | g171L         | Female | 377.64                  | 512.59                          |
| NC-02                | g172L         | Female | 356.45                  | 621.88                          |
| NC-03                | g173L         | Male   | 422.61                  | 573.10                          |
| NC-04                | g174L         | Male   | 488.53                  | 577.85                          |
| NC-05                | g175L         | Male   | 414.54                  | 546.28                          |

#### Skin reactions scores during animal irritation test

Table S4 Skin reaction scores of test group animals during animal irritation test

| Animal number | Sex  | Test site | Score after 1 hour |   | Score after 24 hours |   | Score after 48 hours |   | Score after 72 hours |   |
|---------------|------|-----------|--------------------|---|----------------------|---|----------------------|---|----------------------|---|
|               |      |           | E                  | O | E                    | O | E                    | O | E                    | O |
| r010L         | Male | Site 1    | 0                  | 0 | 0                    | 0 | 0                    | 0 | 0                    | 0 |
|               |      | Site 2    | 0                  | 0 | 0                    | 0 | 0                    | 0 | 0                    | 0 |
| r012L         | Male | Site 1    | 0                  | 0 | 0                    | 0 | 0                    | 0 | 0                    | 0 |
|               |      | Site 2    | 0                  | 0 | 0                    | 0 | 0                    | 0 | 0                    | 0 |
| r013L         | Male | Site 1    | 0                  | 0 | 0                    | 0 | 0                    | 0 | 0                    | 0 |
|               |      | Site 2    | 0                  | 0 | 0                    | 0 | 0                    | 0 | 0                    | 0 |

E: Erythema, O: Oedema

Table S5 Skin reaction scores of negative control group animals during animal irritation test

| Animal number | Sex  | Test site | Score after 1 hour |   | Score after 24 hours |   | Score after 48 hours |   | Score after 72 hours |   |
|---------------|------|-----------|--------------------|---|----------------------|---|----------------------|---|----------------------|---|
|               |      |           | E                  | O | E                    | O | E                    | O | E                    | O |
| r010L         | Male | Site 1    | 0                  | 0 | 0                    | 0 | 0                    | 0 | 0                    | 0 |
|               |      | Site 2    | 0                  | 0 | 0                    | 0 | 0                    | 0 | 0                    | 0 |
| r012L         | Male | Site 1    | 0                  | 0 | 0                    | 0 | 0                    | 0 | 0                    | 0 |
|               |      | Site 2    | 0                  | 0 | 0                    | 0 | 0                    | 0 | 0                    | 0 |
| r013L         | Male | Site 1    | 0                  | 0 | 0                    | 0 | 0                    | 0 | 0                    | 0 |
|               |      | Site 2    | 0                  | 0 | 0                    | 0 | 0                    | 0 | 0                    | 0 |

Table S6 Skin reaction scores of positive control group animals during animal irritation test

| Animal number | Sex    | Test site | Score after 1 hour |   | Score after 24 hours |   | Score after 48 hours |   | Score after 72 hours |   |
|---------------|--------|-----------|--------------------|---|----------------------|---|----------------------|---|----------------------|---|
|               |        |           | E                  | O | E                    | O | E                    | O | E                    | O |
| r003L         | Female | Site 1    | 3                  | 3 | 4                    | 4 | 4                    | 4 | 4                    | 4 |
|               |        | Site 2    | 3                  | 3 | 4                    | 4 | 4                    | 4 | 4                    | 4 |
| r004L         | Male   | Site 1    | 4                  | 4 | 4                    | 4 | 4                    | 4 | 4                    | 4 |
|               |        | Site 2    | 4                  | 4 | 4                    | 4 | 4                    | 4 | 4                    | 4 |
| r006L         | Male   | Site 1    | 4                  | 4 | 4                    | 4 | 4                    | 4 | 4                    | 4 |
|               |        | Site 2    | 4                  | 4 | 4                    | 4 | 4                    | 4 | 4                    | 4 |
